Anesthesiology  
73:364, 1990

## Paralysis after Long-Term Administration of Vecuronium: I

*To the Editor:*—Recently Segredo *et al.*<sup>1</sup> reported prolonged neuromuscular blockade in two critically ill patients with renal failure, both of whom had received a prolonged infusion of vecuronium. The problem of prolonged paralysis when a vecuronium infusion is used in the presence of renal failure is not new. Although a number of reports have suggested that there is little difference between the pharmacokinetics of vecuronium in patients with and without renal failure, those reports have examined very short infusions or single bolus doses<sup>4,5</sup> and are more than matched by others describing prolongation of the action of vecuronium in the presence of renal failure.<sup>1-3,6-8\*</sup> Indeed, the actions of most neuromuscular blocking agents are prolonged in renal failure (see Bevan *et al.*).<sup>7</sup>

It is the routine practice in our intensive care unit to monitor neuromuscular blockade whenever neuromuscular relaxants are used. Thus we hope to maintain neuromuscular blockade at whatever level we require, and avoid the problems of prolonged paralysis. I therefore urge others to adopt the practice of neuromuscular monitoring in the intensive care unit. Few anesthesiologists would use a muscle relaxant in the operating room without monitoring neuromuscular blockade; why should there be a different standard in the intensive care unit?

BRIAN J. POLLARD, B.PHARM.,  
M.B., CH.B., F.F.A.R.C.S.  
*Senior Lecturer in Anaesthesia  
Department of Anaesthesia*

---

\* Lynam DP, Cronnelly R, Arden J, Castagnoli K, Canfell C, Miller RD: The pharmacodynamics and pharmacokinetics of vecuronium in patients with and without renal failure. *ANESTHESIOLOGY* 65:A296, 1986

Anesthesiology  
73:364, 1990

*In Reply:*—Dr. Pollard's two main messages should be apparent to all clinicians. First, to monitor the response to a neuromuscular blocking drug when given to patients in the intensive care unit is obvious. Second, we agree that the most recent publications suggest that prolonged administration of vecuronium to patients with renal failure may result in an increasing duration of neuromuscular blockade. Vecuronium is the drug that often is given to these patients because of its lack of cardiovascular effects. The point of our report is that the 3-hydroxy metabolite of vecuronium appears to be important in patients who have received vecuronium for several days. This finding has not been suggested or reported in any previous publications.

VERONICA SEGREDO, M.D.  
*Visiting Research Fellow*

*The University of Manchester  
Manchester Royal Infirmary  
Oxford Road  
Manchester M13 9WL, United Kingdom*

### REFERENCES

1. Segredo V, Matthay MA, Sharma ML, Gruenke LD, Caldwell JE, Miller RD: Prolonged neuromuscular blockade after long-term administration of vecuronium in two critically ill patients. *ANESTHESIOLOGY* 72:566-570, 1990
2. Cody MW, Dorman FM: Recurarisation after vecuronium in a patient with renal failure. *Anaesthesia* 42:993-995, 1987
3. Slater RM, Pollard BJ, Doran BRH: Prolonged neuromuscular blockade with vecuronium in renal failure. *Anaesthesia* 43:250-251, 1988
4. Fahey MR, Morris RB, Miller RD, Nguyen T-L, Upton RA: Pharmacokinetics of Org NC45 (Norcuron) in patients with and without renal failure. *Br J Anaesth* 53:1049-1053, 1981
5. Bencini AF, Scaf AHJ, Sohn YJ, Neistalman C, Lienart A, Kensten UW, Schwartz S, Agoston S: Disposition and urinary excretion of vecuronium bromide in anaesthetized patients with normal renal function or renal failure. *Anesth Analg* 65:245-251, 1986
6. Lepage JY, Malinge M, Cozian A, Pinard M, Blanloeil Y, Sower R: Vecuronium and atracurium in patients with end stage renal failure. *Br J Anaesth* 59:1004-1010, 1987
7. Bevan DR, Donati F, Gyasi H, Williams A: Vecuronium in renal failure. *Can Anaesth Soc J* 31:491-496, 1984
8. Starsnic MA, Goldberg ME, Ritter DE, Marr AT, Sosis M, Larijani GE: Does vecuronium accumulate in the renal transplant patient? *Can J Anaesth* 36:35-39, 1989

(Accepted for publication May 21, 1990.)

RONALD D. MILLER, M.D.  
*Professor and Chairman of Anesthesia  
Professor of Pharmacology*

*Department of Anesthesia  
C-450, Box 0648  
University of California, San  
Francisco School of Medicine  
San Francisco, California 94143-  
0648*

(Accepted for publication May 21, 1990.)
